# Supplementary material for: An Exploratory In Vivo Study on the Effect of Annurca Apple Extract on Hair Growth in Mice
Source: MDPI journal article supplement (doi:10.3390/cimb44120428), 2022-12-09
Supplement: s1 [file s1]

**Table S1.** Hair growth score for 21 days of treatment with AAE.

| <b>Control Group</b> | <b>AAE Low</b> | <b>AAE High</b> |
|----------------------|----------------|-----------------|
| 1.000 ± 0.000        | 1.000 ± 0.000  | 1.000 ± 0.000   |
| 1.583 ± 0.000        | 1.000 ± 0.000  | 1.000 ± 0.000   |
| 1.583 ± 0.344        | 2.917 ± 0.837* | 2.292 ± 0.443*  |
| 2.583 ± 0.687        | 4.125 ± 0.641* | 4.000 ± 0.354*  |
| 4.167 ± 0.786        | 5.000 ± 0.000  | 5.000 ± 0.000   |
| 4.708 ± 0.652        | 5.000 ± 0.000  | 5.000 ± 0.000   |
